# Supplementary material for: Survival Factor A (SvfA) Contributes to Aspergillus nidulans Pathogenicity
Source: J Fungi (Basel). 2023 Jan 21;9(2):143. doi: 10.3390/jof9020143 (PMC9962611; doi:10.3390/jof9020143)
Supplement: Supplementary file 1 [file jof-09-00143-s001.zip › Supplementary Table S1.xlsx]

## Sheet: Sheet1
Supplementary Table S1. Primers used in this study
Name	Sequence (5’ to 3’)
RT-qPCR analysis
18S qRT F	CTTGGATTTGCTGAAGACTAAC
18S qRT R	CTAACTTTCGTTCCCTGATTAATG
fksA qRT F	CAATGACCCTCACGATGCCA
fksA qRT R	AGCAATCGCGTGGGCAATAG
agsA qRT F	TACAAGGTACCCAGCAAGCC
agsA qRT R	AGACTGCTATCGGCATACAG
chsA qRT F	TCGCCATGGCTGTCTCTGAA
chsA qRT R	TTGCCCTCGACGAGCTTCTG
chsB qRT F	GGCAAAGGAGAAGAAGCTGT
chsB qRT R	CTTCTCTTCCTTCTCCTCGG
chsC qRT F	GAGGCGGAGCTATGAAATT
chsC qRT R	AACAGCGCCCAGAGCAAAAT
chsD qRT F	CTTGCTCGCCCTTATTCTTG
chsD qRT R	GAGTATCGCCCCAACTGAAG
chsG qRT F	CCTTAGTCGCAAGGCTCAAG
chsG qRT R	GCTGGACTGGCCAATCTGTT
rodA qRT F	GGTGACACCACAACCGTTGA
rodA qRT R	GCTTGCACTTCTGGTTGACA
rodB qRT F	CTACAAAAGGGTATCGCCGC
rodB qRT R	CGCACAGCAAGCAATGTTCT
AN10030 qRT F	GCCACTGAAGGTGTCCTTAC
AN10030 qRT R	AAAGGAGTGGAGTCGACATG
ptrA qRT F	GGATATCCTCTCCGCTTGGA
ptrA qRT R	TTAATGCGGGAAACCACAGC
RT-q ANsvfA FOR	CGTATCGACGTCATGGCTGA
RT-q ANsvfA REV	AGGGAGAGCTTCTGTTGAGG
RT-q AfsvfA FOR	TCAACCTCACATCTGGCACT
RT-q AfsvfA REV	CAGTTCCCTCCTCGTTCAGT
